# Supplementary material
Source: PubMed Central journal article supplement (PMC8255212)
Supplement: ajnmmi0011-0218-f6.pdf [file ajnmmi0011-0218-f6.pdf]

## Therapy response

**Supplementary Table 1.** Changes in SUVmax and PSA and time to PSA progression

| Patients | % $\Delta$ SUVmax after 1 <sup>st</sup> cycle | % $\Delta$ SUVmax after 6 <sup>th</sup> cycle | % $\Delta$ PSA after 1 <sup>st</sup> cycle | % $\Delta$ PSA after 6 <sup>th</sup> cycle | Time to PSA progression (days) |
|----------|-----------------------------------------------|-----------------------------------------------|--------------------------------------------|--------------------------------------------|--------------------------------|
| 1        | 26.3                                          | -                                             | 0.0                                        | -                                          | -                              |
| 2        | -28.6                                         | -47.2                                         | -51.7                                      | -84.2                                      | 199                            |
| 3        | -11.9                                         | -13.2                                         | -20.7                                      | -28.5                                      | 397                            |
| 4        | -20.6                                         | -34.4                                         | -6.1                                       | -75.8                                      | 175                            |
| 5        | -6.2                                          | -                                             | 100                                        | -                                          | 56                             |
| 6        | -2.2                                          | 0.8                                           | 68.3                                       | 62.5                                       | 245                            |
| 7        | 65.8                                          | -                                             | 22.4                                       | -                                          | -                              |

$\Delta$ = change.
